# Supplementary material for: ZnTeMoO6: a strong second-harmonic generation material originating from three types of asymmetric building units
Source: Royal Society of Chemistry journal article supplement (doi:10.1039/c3ra40247a), 2013-01-01
Supplement: c3ra40247a.pdf [file c3ra40247a.pdf]

## Supporting Information

# ZnTeMoO<sub>6</sub>: A strong second-harmonic generation material originating from three types of asymmetric building units

*Sangen Zhao,<sup>a</sup> Junhua Luo,<sup>a,\*</sup> Pan Zhou,<sup>a,b</sup> Shu-quan Zhang,<sup>a</sup> Zihua Sun,<sup>a</sup> and*

*Maochun Hong<sup>a</sup>*

<sup>a</sup> Key Laboratory of Optoelectronic Materials Chemistry and Physics, Fujian Institute of Research on the Structure of Matter, Chinese Academy of Sciences, Fuzhou, Fujian 350002, China.

<sup>b</sup> Graduate School of the Chinese Academy of Sciences, Beijing 100039, People's Republic of China

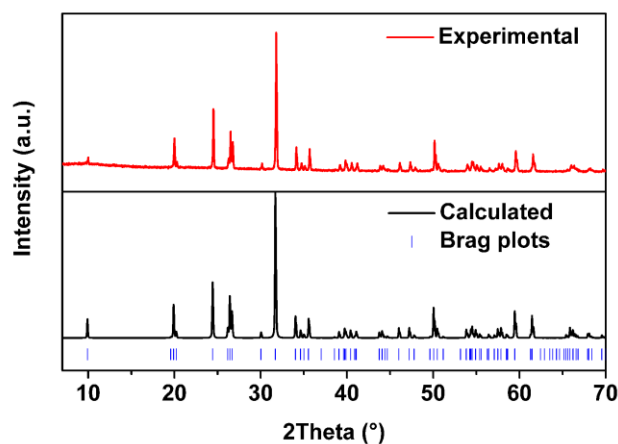

**Figure S1.** Experimental and calculated PXRD patterns for ZnTeMoO<sub>6</sub>.

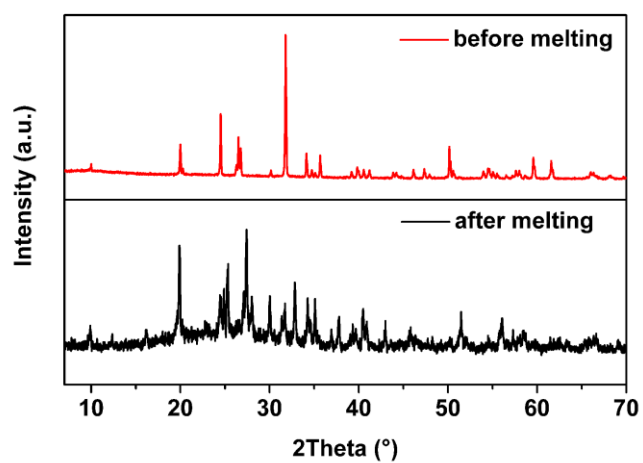

**Figure S2.** XRD patterns of ZnTeMoO<sub>6</sub> before and after melting.

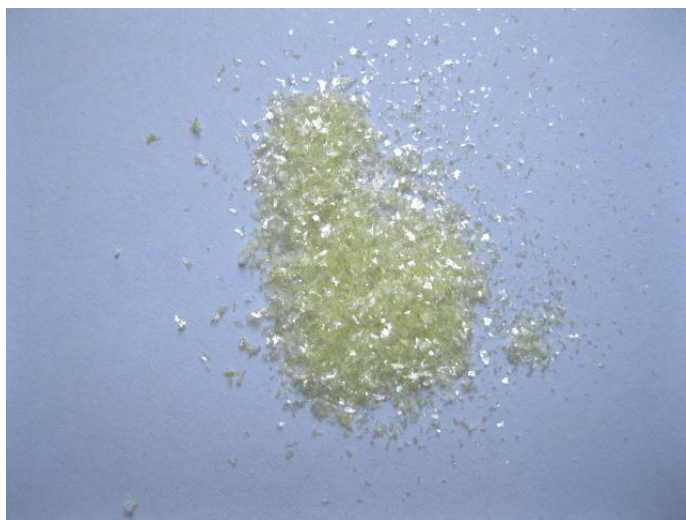

**Figure S3.** Photograph of the volatile matter.

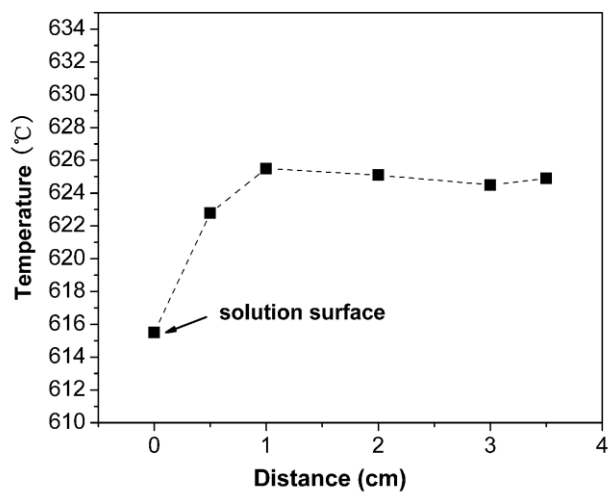

**Figure S4.** The representative temperature gradient in the vertical direction of the furnace.

**Table S1.** Selected bond distances (Å) and angles (deg) for ZnTeMoO<sub>6</sub>.

|                      |           |                                         |          |
|----------------------|-----------|-----------------------------------------|----------|
| Zn—O1 <sup>i</sup>   | 2.05(1)   | O1 <sup>i</sup> —Zn—O2                  | 167.2(4) |
| Zn—O1 <sup>ii</sup>  | 2.05(1)   | O1 <sup>ii</sup> —Zn—O2                 | 82.9(4)  |
| Zn—O1 <sup>iii</sup> | 2.186(9)  | O1 <sup>iii</sup> —Zn—O2                | 71.9(3)  |
| Zn—O1                | 2.186(9)  | O1—Zn—O2                                | 78.3(4)  |
| Zn—O2                | 2.269(10) | O1 <sup>i</sup> —Zn—O2 <sup>iii</sup>   | 82.9(4)  |
| Zn—O2 <sup>iii</sup> | 2.269(10) | O1 <sup>ii</sup> —Zn—O2 <sup>iii</sup>  | 167.2(4) |
| Mo—O3 <sup>iv</sup>  | 1.729(10) | O1 <sup>iii</sup> —Zn—O2 <sup>iii</sup> | 78.3(4)  |
| Mo—O3                | 1.729(10) | O1—Zn—O2 <sup>iii</sup>                 | 71.9(3)  |
| Mo—O2                | 1.843(9)  | O2—Zn—O2 <sup>iii</sup>                 | 84.9(5)  |
| Mo—O2 <sup>iv</sup>  | 1.843(9)  | O3 <sup>iv</sup> —Mo—O3                 | 104.4(7) |
| Te—O1 <sup>v</sup>   | 1.888(10) | O3 <sup>iv</sup> —Mo—O2                 | 106.1(4) |
| Te—O1                | 1.888(10) | O3—Mo—O2                                | 108.0(4) |
| Te—O2 <sup>iii</sup> | 2.097(9)  | O3 <sup>iv</sup> —Mo—O2 <sup>iv</sup>   | 108.0(4) |
| Te—O2 <sup>vi</sup>  | 2.097(9)  | O1 <sup>v</sup> —Te—O1                  | 100.2(7) |
|                      |           | O1 <sup>v</sup> —Te—O2 <sup>iii</sup>   | 87.6(4)  |
|                      |           | O1—Te—O2 <sup>iii</sup>                 | 81.9(4)  |
|                      |           | O1 <sup>v</sup> —Te—O2 <sup>vi</sup>    | 81.9(4)  |
|                      |           | O1—Te—O2 <sup>vi</sup>                  | 87.6(4)  |
|                      |           | O2 <sup>iii</sup> —Te—O2 <sup>vi</sup>  | 163.7(5) |

Symmetry code: (i) -0.5+x, 0.5-y, 1-z; (ii) 0.5-x, 0.5+y, 1-z; (iii) -x, 1-y, z; (iv) 1-x, 1-y, z; (v) -x, -y, z; (vi) x, -1+y, z; (vii) 0.5+x, 0.5-y, 1-z; (viii) x, 1+y, z.

**Table S2.** Anisotropic displacement parameters ( $\text{\AA}^2$ ) for  $\text{ZnTeMoO}_6$ .

| Atom | $U_{11}$  | $U_{22}$  | $U_{33}$  | $U_{12}$    | $U_{13}$ | $U_{23}$  |
|------|-----------|-----------|-----------|-------------|----------|-----------|
| Zn   | 0.0131(9) | 0.0130(9) | 0.0158(9) | -0.0019(12) | 0.00000  | 0.00000   |
| Mo   | 0.0109(6) | 0.0119(7) | 0.0158(7) | 0.0027(9)   | 0.00000  | 0.00000   |
| Te   | 0.0105(5) | 0.0101(5) | 0.0127(6) | 0.0003(6)   | 0.00000  | 0.00000   |
| O1   | 0.019(5)  | 0.014(4)  | 0.030(5)  | 0.008(4)    | 0.007(5) | 0.005(4)  |
| O2   | 0.019(5)  | 0.009(4)  | 0.018(4)  | -0.001(3)   | 0.005(5) | -0.002(4) |
| O3   | 0.022(5)  | 0.023(5)  | 0.023(5)  | -0.001(4)   | 0.008(5) | -0.001(5) |
